# Supplementary material
Source: publisher site journal article supplement (https://static.cambridge.org/content/id/urn:cambridge.org:id:article:S0033589418001138/resource/name/Pokines_et_al_supplemental_information.doc)
Supplement: Supplementary file 1 [file Pokines_et_al_supplemental_information.doc]

The following 3D scans are available for free download as .stl files. These are intended only for research purposes and cannot be disseminated in any way or format without the previous written consent of the senior author. Researchers may please contact the senior author if they have any questions about 3D printing these images for research purposes. All files and 3D prints from these files also may be used for academic teaching purposes as long as proper citation of the accompanying article is included. Any download of these materials indicates assent with these outlined policies.

| **File(s)** | **Corresponds with Text Figure** | **Element** |
| --- | --- | --- |
| SM1_3803_calcaneus | Figure 6d | Left calcaneus, *Camelus* |
| SM1_3418, SM1_3419, SM1_3420, SM1_3398 | Figure 9 | Upper left partial (probable third) molar, *Palaeoloxodon* cf. *recki* |
| SM1_2915 | Figure 10 | Upper right partial (probable third) molar, *Palaeoloxodon* cf. *recki* |
| SM1_disturbed_a, SM1_disturbed_b | Figure 13 | Partial left lower (second or third) molar, *Elephas* cf. *hysudricus* |
| SM1_disturbed_c | Figure 15 | Lower molar fragment, indeterminate elephantid |
